## Association of Genetically Predicted Levels of Circulating Blood Lipids with Coronary Artery Disease Incidence

Running Title: Manikpurage et al, *Blood Lipids PRS and Coronary Artery Disease*

Hasanga D. Manikpurage<sup>a</sup>, PhD, Jasmin Ricard<sup>a</sup>, MSc, Ursula Houessou<sup>a</sup>, MSc, Jérôme Bourgault<sup>a</sup>, MSc, Eloi Gagnon<sup>a</sup>, MSc, Emilie Gobeil<sup>a</sup>, BSc, Arnaud Girard<sup>a</sup>, MSc, Zhonglin Li<sup>a</sup>, MSc, Aida Eslami<sup>a,b</sup>, PhD, Patrick Mathieu<sup>a,c</sup>, MD, MSc, Yohan Bossé<sup>a,d</sup>, PhD, Benoit J. Arsenault, PhD<sup>a,e</sup>, Sébastien Thériault<sup>a,f</sup>, MD, MSc

<sup>a</sup>Centre de Recherche de l'Institut Universitaire de Cardiologie et de Pneumologie de Québec - Université Laval, Québec (QC), Canada

<sup>b</sup>Department of Social and Preventive Medicine, Faculty of Medicine, Université Laval, Québec (QC), Canada

<sup>c</sup>Department of Surgery, Faculty of Medicine, Université Laval, Québec (QC), Canada

<sup>d</sup>Department of Molecular Medicine, Faculty of Medicine, Université Laval, Québec (QC), Canada

<sup>e</sup>Department of Medicine, Faculty of Medicine, Université Laval, Québec (QC), Canada

<sup>f</sup>Department of Molecular Biology, Medical Biochemistry and Pathology, Faculty of Medicine, Université Laval, Québec (QC), Canada

Word Count: 3,184 (including introduction, methods, results and discussion)

### \*Address for correspondence

Sébastien Thériault, MD, MSc, FRCPC

Institut Universitaire de Cardiologie et de Pneumologie de Québec – Université Laval

C-2113, 2725 chemin Ste-Foy

Québec (QC), Canada, G1V 4G5

T : 418-656-8711 ext. 2351 - E : [sebastien.theriault@criucpq.ulaval.ca](mailto:sebastien.theriault@criucpq.ulaval.ca)

Manikpurage et al.

## Abstract

**Background:** Estimating the genetic risk of coronary artery disease (CAD) is now possible by aggregating data from genome-wide association studies (GWAS) into polygenic risk scores (PRS). Combining multiple PRS for specific circulating blood lipids could improve risk prediction. Here, we sought to evaluate the performance of PRS derived from CAD and blood lipids GWAS to predict the incidence of CAD.

**Methods:** This study included individuals aged between 40 and 69 recruited in UK Biobank (UKB). We conducted GWAS for blood lipids measured by nuclear magnetic resonance in individuals without lipid-lowering treatments (n=73,915). Summary statistics were used to derive and calculate PRS in the remaining participants (n=318,051). A PRS<sub>CAD</sub> was also derived using the CARDIoGRAMplusC4D GWAS. Hazard ratios (HR) for CAD (9,017 / 301,576; median follow-up time: 12.6 years) were calculated per standard deviation increase in each PRS. Discrimination capacity and goodness of fit of the models were evaluated.

**Results:** Out of 30 PRS, 28 were significantly associated with the incidence of CAD ( $P < 0.05$ ). The optimal combination of PRS included PRS for CAD, VLDL-C, total cholesterol and triglycerides. Discriminative capacities were significantly increased in the model including PRS<sub>CAD</sub> and clinical risk factors (CRF) (C-statistic=0.778 [0.773-0.782]) compared to the model with CRF only (C-statistic=0.755 [0.751-0.760]). Although the C-statistic remained similar when independent lipids PRS were added to the model with

Manikpurage et al.

PRS<sub>CAD</sub> and CRF (C-statistic=0.778 [0.773-0.783]), the goodness of fit was significantly increased (chi-square test statistic=20.18,  $P=1.56e-04$ ).

**Conclusions:** Although independently associated with CAD incidence, blood lipids PRS provide modest improvement in the predictive performance when added to PRS<sub>CAD</sub>.

**Keywords:** Polygenic Risk Scores; Lipoproteins; Fatty Acids; Nuclear Magnetic Resonance; Genetics; Coronary Artery Disease; Myocardial Infarction; Coronary Revascularization; Primary Prevention; Risk Stratification

## Highlights

- Genome-wide association studies were conducted on 29 selected lipid traits measured by nuclear magnetic resonance spectroscopy in 73,915 participants from UK Biobank who were not taking lipid-lowering treatment.
- Polygenic risk scores for 27 out of 29 of these traits were associated with the incidence of coronary artery disease (CAD) in 9,017 cases out of 301,576 individuals followed for a median of 12.6 years.
- When combined to a PRS for coronary artery disease, there was a significant but modest improvement in the discrimination capacity for incident CAD.
- PRS for certain lipid traits might help to stratify the risk of CAD.

Manikpurage et al.

## **Non-Standard Abbreviations and Acronyms**

ApoA1: Apolipoprotein A1

ApoB: Apolipoprotein B

CAD: Coronary Artery Disease

CRF: Clinical Risk Factors

DHA: Docosahexaenoic Acid

EPA: Eicosapentaenoic Acid

FA: Fatty Acids

FUMA: Functional Mapping and Annotation

GLGC: Global Lipid Genetic Consortium

GWAS: Genome Wide Association Study

HES: Hospital Episode Statistics

IDL: Intermediate Density Lipoproteins

IS: Ischemic Stroke

LA: Linoleic Acid

LD: Linkage Disequilibrium

LLT: Lipid Lowering Treatments

Lp(a): Lipoprotein(a)

MAGMA: Multi-marker Analysis of GenoMic Annotation

MI: Myocardial Infarction

MUFA: Mono-Unsaturated Fatty Acids

NMR: Nuclear Magnetic Resonance

NRI: Net Reclassification Improvement

Manikpurage et al.

OPSC-4: Office Of Population, Censuses and Surveys: Classification of Interventions and Procedures, Version 4

PCs: First Ten Genetic Principal Components

PCE: Pooled Cohort Equation

PRS: Polygenic Risk Score

PUFA: Polyunsaturated Fatty Acids

SFA: Saturated Fatty Acids

SBP: Systolic Blood Pressure

TC: Total Cholesterol

TG: Triglycerides

UKB: UK Biobank

VLDL: Very Low-Density Lipoproteins

XL-VLDL: Extra Large Very Low-Density Lipoproteins or Chylomicrons

Manikpurage et al.

## Graphical Abstract

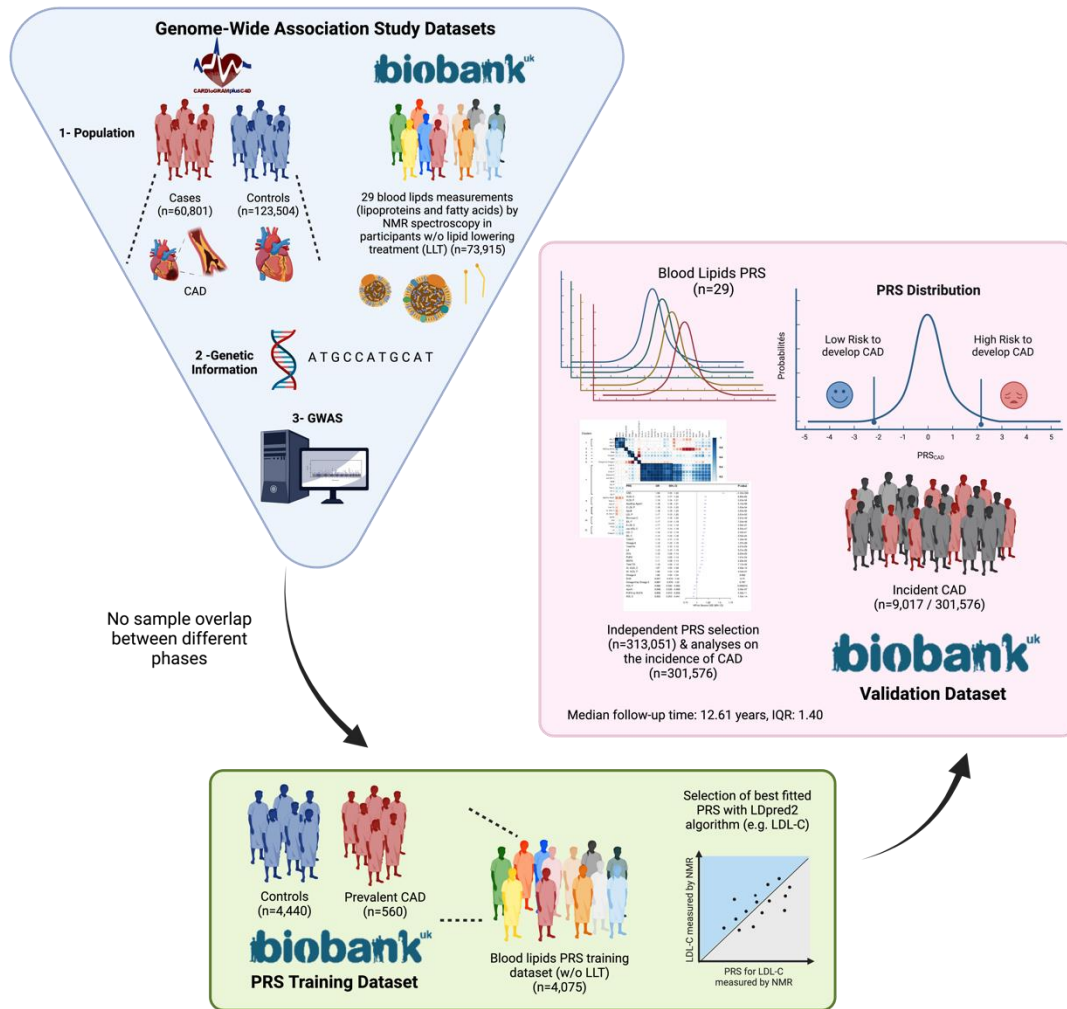

Manikpurage et al.

## Introduction

Circulating lipoproteins are recognized primordial risk factors for atherosclerotic cardiovascular diseases, such as coronary artery disease (CAD). The cholesterol content of low-density lipoproteins (LDL-C) is associated with atheroma development and progression and is routinely monitored for clinical management (1). Other lipoproteins have now been associated with CAD (2), including intermediate-density lipoproteins (IDL), very low-density lipoproteins (VLDL) and chylomicrons (also called extra-large very low-density lipoproteins, XL-VLDL) (3). Beyond cholesterol content, density, size, and number of particles of these lipoproteins have been identified as important determinants of atherosclerosis development and cardiovascular outcomes (2,4–6). The measurement of apolipoprotein B (ApoB) allows to estimate particle concentration of these atherogenic lipoproteins. Characteristics of these lipoproteins can be quantified using high-resolution methods such as nuclear magnetic resonance (NMR) spectroscopy (7). A recent study reported significant associations between such measurements and the incidence of major adverse cardiovascular events (8).

Circulating fatty acids (FA) have also been implicated in cardiovascular risk. Many are precursors of bioactive lipids involved in various biological mechanisms such as inflammatory processes or their resolution, immunomodulation, regulation of vascular tone, coagulation and cell migration (9). Recent results of the randomized clinical trial PREDIMED (*Prevención con Dieta Mediterránea*), in which adherence to a Mediterranean diet rich in omega-3 polyunsaturated fatty acids (PUFA) was compared to a low-fat diet, suggested a cardioprotective role of omega-3 PUFA by reducing the

Manikpurage et al.

incidence of primary major cardiovascular events in high-risk individuals (10). Moreover, high doses of omega-3 PUFA-derived components led to a decrease in ischemic events in other randomized clinical trials, mainly in patients with hypertriglyceridemia (11,12).

Many factors influence blood lipid levels. Their intestinal absorption and downstream catabolism involve various enzymatic reactions and molecular processes. Each biological step is influenced by genetic variations, translating, for instance, in variations of enzyme or protein expression, structure or activity. This is supported by a recent meta-analysis of genome-wide association studies (GWAS) involving 1,654,960 participants from various ancestries that uncovered 773 genomic loci associated with at least one lipid trait from standard lipid profiling (i.e. high-density lipoprotein cholesterol [HDL-C], LDL-C, triglycerides [TG] and total cholesterol [Total C]) in one or more ancestries (13).

From GWAS data, it is possible to aggregate polygenic effects into a single metric to predict the risk of complex diseases. Several methods to calculate these polygenic risk scores (PRS) are now available (14). These instruments have shown promising predictive performance for several diseases including CAD (15). When added to traditional risk factors and clinical scores, PRS improve the predictive performance for myocardial infarction (MI), especially in middle-aged men (16,17). Implementing these tools in clinical settings has the potential to delay the development of CAD with appropriate interventions in patients at high genetic risk (18–20).



Manikpurage et al.

In this study, we combined PRS for CAD and several circulating lipoproteins and fatty acids to predict the incidence of CAD, defined as MI or revascularization procedures, in UK Biobank (UKB). Our main objectives were to: (i) perform genome-wide association analyses on circulating blood lipids measured by NMR in individuals without lipid-lowering treatments, (ii) derive PRS and evaluate their association with the incidence of CAD, and (iii) combine all independent PRS to create a multivariable model and evaluate its performance to predict incident CAD.

Manikpurage et al.

## Methods

Data that support our findings are available through appropriate application to UK Biobank (UKB). UKB is a large-scale prospective study that received approval from the British National Health Service, North West - Haydock Research Ethics Committee (16/NW/0274). This cohort includes electronic health records of > 500,000 individuals aged between 40 and 73 years at baseline and recruited from 2006 to 2010 in the United Kingdom. All participants of UKB provided informed consent at the baseline assessment. Data access permission for this study was granted under UKB application 25205.

Full detailed methods of this study are available in the supplemental materials.

Computational codes are available, without compromising sensitive individual-level data, from the corresponding author upon reasonable request. Summary statistics of genome-wide association studies and effect sizes to calculate PRS will be deposited respectively on GWAS Catalog platform (<https://www.ebi.ac.uk/gwas/>) and PGS Catalog (<https://www.pgscatalog.org>).

Manikpurage et al.

## Results

Supplemental Table I presents the baseline characteristics of UK Biobank participants included in each analysis. GWAS were performed for 29 blood lipid traits in 73,915 individuals not under lipid-lowering treatment (Figure 1). A total of 16,531,032 SNPs were screened during the process. Supplemental Table II reports the number of genome-wide associated loci for each trait, ranging between 19 and 59. Estimated narrow-sense heritability varied between 18% and 28%. The number of genes identified using the MAGMA algorithm implemented in FUMA ranged between 88 (docosahexaenoic acid, DHA) and 240 (ApoB and Omega 6) (Supplemental Table II). The number of common genes between the GWAS for CAD and blood lipids traits from NMR ranged between 0 (HDL-P) and 11 (ApoB, ApoB / apolipoprotein A1 [ApoA1], small LDL particles [S LDL-P], LDL particles [LDL-P], VLDL cholesterol [VLDL-C], VLDL particles [VLDL-P], remnant cholesterol [Remnant C]), representing 6.6% or less of the genes per blood lipid trait. Of the 44 genes identified from CARDIoGRAMplusC4D, 12 (27%) were also identified in at least one or more NMR blood lipids GWAS and 24 (55%) are common with at least one trait from the latest GLGC GWAS. Between 83% and 100% of the genes identified in the NMR lipoprotein GWAS were common with one of the standard lipid traits included in the GLGC GWAS, while this proportion varied from 67% to 97% for the NMR FA GWAS (Supplemental Table II). The mapped genes for the lipoprotein traits could all be found in previous GWAS of lipid traits, except for four genes mapped from the IDL-C, IDL-P or XL-VLDL-C GWAS (Supplemental Table III).

Manikpurage et al.

PRS were derived in the training dataset for each blood lipid trait (n=4,075 individuals, 1,114,806 SNPs) and CAD (n=5,000 individuals, 1,111,015 SNPs) (Supplemental Table IV) and calculated in the validation dataset (n=313,051 individuals). In the training dataset (n=4,075), the lipid PRS all remained strongly associated with their respective lipid trait despite adjustment for PRS<sub>CAD</sub> (Supplemental Table V). As shown in the correlogram (Figure 2), PRS<sub>CAD</sub> was either weakly or not correlated with all other blood lipids PRS (absolute Pearson's correlation r coefficient between 0.01 and 0.19). Using hierarchical clustering, we identified eleven clusters in which PRS were highly correlated with each other (absolute  $r \geq 0.71$ , Supplemental Table VI and Figure 2). There were four clusters for lipoprotein PRS and 6 clusters for FA PRS (Supplemental Table VI and Figure 2).

We investigated the association of each PRS with CAD incidence using Cox proportional hazards models. Out of 30 PRS, 28 were associated with the incidence of CAD in the validation dataset (9,017 incident CAD out of a total of 301,576 participants, median follow-up time: 12.61 years) (Figure 3). PRS<sub>CAD</sub> showed the strongest association (HR=1.59 [1.55 - 1.62],  $P < 1e-300$ ). PRS<sub>VLDL-C</sub> was the most strongly associated lipoprotein PRS (HR=1.19 [1.17 - 1.22],  $P = 8.85e-62$ ) and PRS<sub>Omega 6</sub> was the most strongly associated FA PRS (HR=1.13 [1.10 - 1.15],  $P = 1.27e-29$ ). PRS<sub>DHA</sub> and PRS<sub>Omega 6 / Omega 3</sub> were not significantly associated with CAD incidence. Observational associations between the measured traits and incident CAD were concordant with these associations (Supplemental Table VII).

Manikpurage et al.

Following an iterative process to select independent PRS associated with CAD, four PRS were included into a multivariate model: PRS<sub>CAD</sub>, PRS<sub>VLDL-C</sub>, PRS<sub>Total C</sub>, and PRS<sub>TG</sub> (Supplemental Table VIII). Other PRS were either correlated or did not improve the capacity of the model to identify prevalent CAD. For instance, when FA PRS were added to a model including PRS<sub>VLDL-C</sub>, their effect on prevalent CAD was in the opposite direction and attenuated (Supplemental Table IX).

We tested the model combining PRS<sub>CAD</sub> with selected blood lipids PRS derived from NMR data in a multivariate Cox regression model, including age, sex, and PCs as covariates. Compared to the model without PRS (C-statistic=0.716 [0.711 - 0.721]), both models including PRS<sub>CAD</sub> only and PRS<sub>CAD</sub> with selected blood lipids PRS had significantly higher discriminative capacity with respective C-statistics reaching 0.747 [0.743 - 0.752] and 0.749 [0.744 - 0.754] (Table 1 and Figure 4A). The difference in C-statistics (Table 1) between the model with and without PRS<sub>CAD</sub> was 0.031 [0.028 - 0.034]. The difference in C-statistics was similar when blood lipids PRS were added, compared to the model without PRS (0.033 [0.030 - 0.035]) (Table 1 and Figure 4B), but the difference with the model including only PRS<sub>CAD</sub> was significantly different from the null (0.002 [0.001- 0.003]). A likelihood ratio test (LRT) showed that the full model (i.e. including PRS<sub>CAD</sub> and blood lipids PRS) significantly improved goodness of fit (chi-square test statistic=119.19,  $P=1.16e-25$ ), compared to the nested model (i.e. including PRS<sub>CAD</sub> only). When traditional risk factors were added (i.e., BMI, SBP, hypertension, diabetes, smoking, TG and LDL-C), the discriminative capacities of the model including only PRS<sub>CAD</sub> (C-statistic=0.778 [0.773 - 0.783]) and the model including PRS<sub>CAD</sub> with

Manikpurage et al.

selected blood lipids PRS (C-statistic=0.778 [0.773 - 0.783]) were significantly improved when compared with the model with only risk factors (C-statistic=0.755 [0.751 - 0.760]) (Table 1 and Figure 4A). The increase in C-statistics reached 0.022 (0.020 - 0.025) for both models (Table 1 and Figure 4B). While the difference in C-statistic between the two models (with versus without blood lipids PRS) was not significantly different from the null (0 [0 - 0.001]), the model including blood lipids PRS slightly outperformed the model with only PRS<sub>CAD</sub> in terms of goodness of fit (chi-square test statistic=20.18,  $P=1.56e-04$ ).

Similarly, when the PCE was used, the discriminative capacities of the model including only PRS<sub>CAD</sub> (0.758 [0.753 - 0.763]) and the model including PRS<sub>CAD</sub> with selected blood lipids PRS (C-statistic=0.758 [0.754 - 0.763]) were significantly improved when compared to the model without PRS (C-statistic=0.749 [0.743 - 0.754]) (Table 1). The difference in C-statistic between the two models (with versus without blood lipids PRS) was not different from the null (0 [0 - 0.001]), although the model including blood lipids PRS slightly outperformed the model with only PRS<sub>CAD</sub> in terms of goodness of fit (chi-square test statistic=39.58,  $P=1.31e-08$ ).

Similar results were obtained when analyses were stratified by sex (Table 1 and Figure 4).

Categorized net reclassification improvement (NRI) was calculated using a threshold of 3% (NRI<sup>0.03</sup>) of predicted 10-year risk of CAD. The addition of PRS to the Cox proportional hazard models including PCE resulted in a NRI<sup>0.03</sup> of 0.059 (95% CI, [0.047 to 0.069]), mostly driven by the up reclassification of cases. Continuous NRI (NRI<sup>>0</sup>) was

Manikpurage et al.

equal to 0.374 (95% CI [0.344 to 0.401]) (Supplemental Table X). In age-stratified analysis, individuals from the first tertile of the age distribution (i.e., individuals aged between 40 and 54 years) show the highest reclassification performance with an overall  $\text{NRI}^{0.03}$  reaching 0.135 (95% CI [0.110 to 0.173]), while  $\text{NRI}^{-0}$  reached 0.508 (95% CI [0.446 to 0.564]) (Supplemental Table X).

Manikpurage et al.

## Discussion

We developed PRS from blood lipids measured using NMR in 73,915 European ancestry participants from UKB. Among all tested PRS, 27 were associated with the incidence of CAD in a middle-aged white British population. However, combining a PRS<sub>CAD</sub> with several independent blood lipids PRS offered marginal improvement in discriminative capacity over a PRS<sub>CAD</sub> alone.

Our genome-wide association analyses on 29 circulating blood lipids traits measured using high-throughput NMR spectroscopy confirmed that these traits involve multiple genomic loci and have strong heritabilities (21). A high proportion of the genes identified from these GWAS were already reported in a recently published GWAS for standard lipid traits from the GLGC (13). However, only a few were retrieved in the CAD GWAS from CARDIoGRAMplusC4D (22), consistent with the weak correlation observed between PRS<sub>CAD</sub> and blood lipids PRS. Using an independent subset of UKB, we found that out of 29 circulating blood lipids PRS, 27 were associated with the incidence of CAD, including all tested lipoproteins PRS. This adds more lipoprotein-related traits to the previously determined list of PRS associated with CAD in British adults (23) or with the extent of CAD in Icelandic adults (i.e. HDL-C, LDL-C, non-HDL-C and TG) (24). More specifically, in our study, PRS for particles and cholesterol content of ApoB-containing lipoproteins (i.e. small LDL, LDL, IDL, VLDL, remnant and chylomicron) predicted similarly the incidence of CAD. Globally, these associations were significantly stronger than total C or total TG. VLDL-C and VLDL-P were the most associated



Manikpurage et al.

lipoproteins PRS with the incidence of CAD, although they were strongly correlated with genetically-predicted levels of ApoB (Pearson's correlation  $r=0.88$  for VLDL-C and  $0.84$  for VLDL-P). The results are consistent with the strong association between VLDL-C measured with NMR in participants without lipid-lowering treatment in UKB and incident myocardial infarction observed previously (8).(6)(4) These findings further emphasize the importance of VLDL particles, which have been shown to be trapped preferentially within the intima in animal models (25) .

We also provide new insights concerning the association between circulating FA and the incidence of CAD. In our analysis, the most associated FA PRS were  $PRS_{\text{Omega-6}}$  and  $PRS_{\text{Total FA}}$  (positive association). Significant associations were also observed for PRS for PUFA, mono-unsaturated fatty acids (MUFA), linoleic acid (LA) and saturated fatty acids (SFA). However, the PRS for all these FA traits were highly correlated to ApoB containing lipoproteins PRS, notably to  $PRS_{\text{VLDL-C}}$  and  $PRS_{\text{VLDL-P}}$  (with Pearson's correlation  $r>0.7$ ). Adding  $PRS_{\text{VLDL-C}}$  in the models inverted and attenuated these associations in multivariate analyses. We also show that the  $PRS_{\text{PUFA / MUFA}}$  is inversely associated with genetically-predicted TG and TG-rich lipoproteins such as chylomicrons as well as the incidence of CAD. Previous observational studies showed an overall protective role of circulating PUFA measured by NMR, whereas MUFA levels were associated with an increased cardiovascular risk (8,26). However, a recent Mendelian randomization study using the same NMR data in UKB did not find convincing evidence of a protective role for circulating PUFA on the risk of cardiovascular diseases. The authors of this study suggested a possible bias caused by horizontal pleiotropy, notably

Manikpurage et al.

due to the presence of variants at the *FADS* locus implicated in lipoprotein metabolism in their genetic instruments (27). In this sense, we also report here a high number of common genes between FA GWAS and lipid profiles GWAS. Pleiotropic effects of variants involved in both FA and lipoprotein metabolism make it difficult to draw conclusions concerning the protective or deleterious role of circulating PUFA. Finally, PRS of specific types of PUFA, such as PRS<sub>DHA</sub>, PRS<sub>Omega 6 / Omega 3</sub> and PRS<sub>Omega 3</sub> were not or weakly associated with the incidence of CAD. Circulating total omega-3 FA and specific omega-3 FA fractions, including DHA and eicosapentaenoic acid (EPA) levels were already reported as conferring a lower cardiovascular risk and associated to a lower mortality rate when naturally found at high levels in blood (28). However, recent evidence suggests that EPA might drive the cardioprotective role, as the combination of EPA and DHA has not shown convincing benefits in clinical trials (29). In contrast, high doses of icosapent ethyl, a purified EPA ethyl ester, were shown to reduce TG plasma levels and cardiovascular events in high-risk individuals with hypertriglyceridemia already on statin therapy(11,29,30). Of note, we could not develop a PRS for EPA since EPA levels were not available in UKB.

Overall, despite the fact that most circulating blood lipids PRS individually predicted the incidence of CAD, adding multiple independent blood lipids PRS in a model already including PRS<sub>CAD</sub> increased only marginally the prediction of CAD. One explanation for this result could be that the PRS<sub>CAD</sub> already captures part of the genetic risk linked to blood lipids. In our study, out of the 44 significant genes identified from the meta-analysis of CARDIoGRAMplusC4D (22), 12 genes (27%) were found in common with

Manikpurage et al.

our GWAS of circulating blood lipids, whereas 24 genes (55%) were common to at least one of the four lipid traits included in the latest GLGC GWAS (13). The lipid PRS however remained strongly associated with the corresponding lipid trait after adjusting for PRS<sub>CAD</sub>. A previous study led in a Finnish population evaluated the association of a combination of PRS for LDL-C, TG and CAD with myocardial infarction or revascularization. They showed that the associations for the two lipid PRS were slightly attenuated when adjusting for PRS<sub>CAD</sub>, but remained significant, with OR of 1.11 and 1.06 per SD, respectively, in the complete model (31).

Furthermore, we used data from a population of middle-aged individuals with a low event rate. A substantial proportion (15.1%) were already on lipid-lowering treatments at baseline, without having a prior history of CAD. A possible selection bias related to the healthier lifestyle of UKB participants compared to the UK general population was already reported (32). Lipid-lowering treatment and a healthy lifestyle could protect against high genetically-determined lipid levels.

Combining PRS for more risk factors could potentially further improve risk prediction. For instance, Ramirez et al. have combined PRS for common risk factors associated with CAD (i.e. BMI, SBP, diastolic blood pressure, C-reactive protein, type 2 diabetes, heart failure, standard HDL-C, standard LDL-C, standard TG, T-peak-to-T end interval) using data from UKB. They improved significantly their models' discriminative capacities when PRS for risk factors were added to a PRS<sub>CAD</sub>. However, the PRS for risk factors did not significantly improve the models' discriminative capacities when considering also the QRISK3 clinical risk score (23). Nonetheless, genetic information to calculate PRS for all

Manikpurage et al.

traits is available with genome-wide genotyping once in a lifetime. We show statistically significant improvement in reclassification when adding multiple PRS, including a PRS<sub>CAD</sub>, to a clinical risk score, as shown previously (17). Blood lipids and other risk factors PRS could also help to identify at a young age individuals presenting higher genetic susceptibilities, providing an opportunity for early preventive interventions. Notably, PRS have been shown to perform better to predict early-onset events (16).

Our study has a few limitations. First, the blood lipids PRS that we derived combined the effect of common SNPs, and thus did not include rare monogenic variants that are responsible for severe dyslipidemias. Second, our analysis was restricted to individuals from white British ancestry. Several other ethnic backgrounds, such as South Asians, are more susceptible to CAD and MI (33,34). The utility of blood lipids PRS needs to be evaluated in other ancestries. Third, we mostly assessed the predictive performance using the Harrell's C-statistic. It has already been demonstrated that this metric is not a perfect indicator of the added value conferred by new predictors in a same model (35). This is why we also compared goodness of fit using the likelihood ratio test. Fourth, we used a modest number of individuals in our GWAS compared to large consortia meta-analyses. However, our study design allowed us to derive PRS for well-characterized blood lipid traits derived from NMR and to avoid sample overlap. The addition of other independent cohorts, including younger individuals and other ancestries, has the potential to increase the discriminative capacities of PRS. Fifth, the derived PRS should be validated and tested in other external and independent cohorts.

Manikpurage et al.

In conclusion, PRS for circulating lipoproteins and fatty acids are associated with the incidence of CAD. However, combining selected independent blood lipids PRS provided a marginal improvement in the discriminative capacity provided by the PRS<sub>CAD</sub> alone. Further studies are needed to evaluate the impact of preventive interventions in individuals at high genetic risk.

Manikpurage et al.

## **Acknowledgement**

We would like to thank all study participants and scientists involved in UK Biobank and in the CARDIoGRAMplusC4D Consortium.

## **Disclosure**

BJA is a consultant for Novartis and Silence Therapeutics and has received research funding from Pfizer and Ionis Pharmaceuticals. The other authors report no conflicts.

## **Sources of funding**

HDM holds a doctoral research award from the *Institut Universitaire de Cardiologie et de Pneumologie de Québec-Université Laval*. BJA holds a senior scholar award from the *Fonds de Recherche du Québec: Santé*. YB holds a Canada Research Chair in Genomics of Heart and Lung Diseases. PM is the recipient of the Joseph C. Edwards Foundation granted to Université Laval. This work was supported by a grant from the Canadian Institutes of Health Research (PJT-162344) to ST.

## **Supplemental Materials**

Supplemental Methods

Manikpurage et al.

Supplemental Tables

References (8,13,16,22,36–44)

Manikpurage et al.

## References

1. Libby P, Buring JE, Badimon L, Hansson GK, Deanfield J, Bittencourt MS, et al. Atherosclerosis. *Nat Rev Dis Primers*. 2019 Dec 16;5(1):56.
2. Richardson TG, Sanderson E, Palmerid TM, Korpelaid MA, Ference BA, Smith GD, et al. Evaluating the relationship between circulating lipoprotein lipids and apolipoproteins with risk of coronary heart disease: A multivariable Mendelian randomisation analysis. *PLoS Med*. 2020 Mar 23;17(3).
3. Sniderman AD, Thanassoulis G, Glavinovic T, Navar AM, Pencina M, Catapano A, et al. Apolipoprotein B Particles and Cardiovascular Disease: A Narrative Review. Vol. 4, *JAMA Cardiology*. American Medical Association; 2019. p. 1287–95.
4. Balling M, Afzal S, Varbo A, Langsted A, Davey Smith G, Nordestgaard BG. VLDL Cholesterol Accounts for One-Half of the Risk of Myocardial Infarction Associated With apoB-Containing Lipoproteins. *J Am Coll Cardiol*. 2020 Dec 8;76(23):2725–35.
5. Johannesen CDL, Mortensen MB, Langsted A, Nordestgaard BG. Apolipoprotein B and Non-HDL Cholesterol Better Reflect Residual Risk Than LDL Cholesterol in Statin-Treated Patients. *J Am Coll Cardiol*. 2021 Mar 23;77(11):1439–50.
6. Marston NA, Giugliano RP, Melloni GEM, Park JG, Morrill V, Blazing MA, et al. Association of Apolipoprotein B-Containing Lipoproteins and Risk of Myocardial Infarction in Individuals with and Without Atherosclerosis: Distinguishing



Manikpurage et al.

- between Particle Concentration, Type, and Content. *JAMA Cardiol.* 2022 Mar 1;7(3):250–6.
7. Mora S, Otvos JD, Rifai N, Rosenson RS, Buring JE, Ridker PM. Lipoprotein particle profiles by nuclear magnetic resonance compared with standard lipids and apolipoproteins in predicting incident cardiovascular disease in women. *Circulation.* 2009;119(7):931–9.
  8. Julkunen H, Cichońska A, Tiainen M, Koskela H, Nybo K, Mäkelä V, et al. Atlas of plasma NMR biomarkers for health and disease in 118,461 individuals from the UK Biobank. *Nat Commun [Internet].* 2023 Feb 3;14(1):604. Available from: <https://www.nature.com/articles/s41467-023-36231-7>
  9. Libby P, Tabas I, Fredman G, Fisher EA. Inflammation and its resolution as determinants of acute coronary syndromes. *Circ Res.* 2014;114(12):1867–79.
  10. Estruch R, Ros E, Salas-Salvadó J, Covas MI, Corella D, Arós F, et al. Primary Prevention of Cardiovascular Disease with a Mediterranean Diet Supplemented with Extra-Virgin Olive Oil or Nuts. *New England Journal of Medicine.* 2018;378(25):e34.
  11. Bhatt DL, Steg PG, Miller M, Brinton EA, Jacobson TA, Ketchum SB, et al. Cardiovascular Risk Reduction with Icosapent Ethyl for Hypertriglyceridemia. *New England Journal of Medicine.* 2019 Jan 3;380(1):11–22.
  12. Ruscica M, Sirtori CR, Carugo S, Calder PC, Corsini A. Omega-3 and cardiovascular prevention – Is this still a choice? *Pharmacol Res.* 2022;182(May):106342.

Manikpurage et al.

13. Graham SE, Clarke SL, Wu KHH, Kanoni S, Zajac GJM, Ramdas S, et al. The power of genetic diversity in genome-wide association studies of lipids. *Nature*. 2021;600(7890):675–9.
14. Ma Y, Zhou X. Genetic prediction of complex traits with polygenic scores: a statistical review. Vol. 37, *Trends in Genetics*. Elsevier Ltd; 2021. p. 995–1011.
15. Khera A V, Chaffin M, Aragam KG, Haas ME, Roselli C, Choi SH, et al. Genome-wide polygenic scores for common diseases identify individuals with risk equivalent to monogenic mutations. 2018;50(September).
16. Manikpurage HD, Eslami A, Perrot N, Li Z, Couture C, Mathieu P, et al. Polygenic Risk Score for Coronary Artery Disease Improves the Prediction of Early-Onset Myocardial Infarction and Mortality in Men. *Circ Genom Precis Med*. 2021 Dec 1;14(6):697–708.
17. Elliott J, Bodinier B, Bond TA, Chadeau-Hyam M, Evangelou E, Moons KGM, et al. Predictive Accuracy of a Polygenic Risk Score-Enhanced Prediction Model vs a Clinical Risk Score for Coronary Artery Disease. *JAMA* [Internet]. 2020;323(7):636–45. Available from: <http://www.ncbi.nlm.nih.gov/pubmed/32068818>
18. Klarin D, Natarajan P. Clinical utility of polygenic risk scores for coronary artery disease. Vol. 19, *Nature Reviews Cardiology*. Nature Research; 2022. p. 291–301.
19. Kiflen M, Le A, Mao S, Lali R, Narula S, Xie F, et al. Cost-Effectiveness of Polygenic Risk Scores to Guide Statin Therapy for Cardiovascular Disease Prevention. *Circ Genom Precis Med*. 2022 Jul 29;

Manikpurage et al.

20. O’Sullivan JW, Raghavan S, Marquez-Luna C, Luzum JA, Damrauer SM, Ashley EA, et al. Polygenic Risk Scores for Cardiovascular Disease: A Scientific Statement From the American Heart Association. *Circulation*. 2022 Aug 23;146(8).
21. Kettunen J, Demirkan A, Würtz P, Draisma HHM, Haller T, Rawal R, et al. Genome-wide study for circulating metabolites identifies 62 loci and reveals novel systemic effects of LPA. *Nat Commun*. 2016 Mar 23;7.
22. Nikpay M, Goel A, Won HH, Hall LM, Willenborg C, Kanoni S, et al. A comprehensive 1000 Genomes-based genome-wide association meta-analysis of coronary artery disease. *Nat Genet*. 2015;47(10):1121–30.
23. Ramírez J, van Duijvenboden S, Young WJ, Tinker A, Lambiase PD, Orini M, et al. Prediction of Coronary Artery Disease and Major Adverse Cardiovascular Events Using Clinical and Genetic Risk Scores for Cardiovascular Risk Factors. *Circ Genom Precis Med*. 2022 Jul 13;101161CIRCGEN121003441.
24. Björnsson E, Thorleifsson G, Helgadóttir A, Gunnason T, Guñbjartsson T, Andersen K, et al. Association of Genetically Predicted Lipid Levels with the Extent of Coronary Atherosclerosis in Icelandic Adults. *JAMA Cardiol*. 2020;5(1):13–20.
25. Nordestgaard BG, Wootton R, Lewis B. Selective retention of VLDL, IDL, and LDL in the arterial intima of genetically hyperlipidemic rabbits in vivo: Molecular size as a determinant of fractional loss from the intima-inner media. *Arterioscler Thromb Vasc Biol*. 1995;15(4):534–42.

Manikpurage et al.

26. Borges MC, Schmidt AF, Jefferis B, Wannamethee SG, Lawlor DA, Kivimaki M, et al. Circulating fatty acids and risk of coronary heart disease and stroke: Individual participant data meta-analysis in up to 16 126 participants. *J Am Heart Assoc.* 2020;9(5).
27. Borges MC, Haycock PC, Zheng J, Hemani G, Holmes M V., Davey Smith G, et al. Role of circulating polyunsaturated fatty acids on cardiovascular diseases risk: analysis using Mendelian randomization and fatty acid genetic association data from over 114,000 UK Biobank participants. *BMC Med.* 2022 Dec;20(1).
28. Mozaffarian D, Lemaitre RN, King IB, Song X, Huang H, Sacks FM, et al. Plasma phospholipid long-chain  $\omega$ -3 fatty acids and total and cause-specific mortality in older adults: a cohort study. *Ann Intern Med.* 2013 Apr 2;158(7):515–25.
29. Mason RP, Libby P, Bhatt DL. Emerging Mechanisms of Cardiovascular Protection for the Omega-3 Fatty Acid Eicosapentaenoic Acid. *Arterioscler Thromb Vasc Biol.* 2020;(May):1135–47.
30. Bays HE, Ballantyne CM, Doyle RT, Juliano RA, Philip S. Icosapent ethyl: Eicosapentaenoic acid concentration and triglyceride-lowering effects across clinical studies. *Prostaglandins Other Lipid Mediat.* 2016;125:57–64.
31. Ripatti P, Rämö JT, Mars NJ, Fu Y, Lin J, Söderlund S, et al. Polygenic Hyperlipidemias and Coronary Artery Disease Risk. *Circ Genom Precis Med.* 2020 Apr 1;13(4):E002725.
32. Fry A, Littlejohns TJ, Sudlow C, Doherty N, Adamska L, Sprosen T, et al. Comparison of Sociodemographic and Health-Related Characteristics of UK

Manikpurage et al.

- Biobank Participants with Those of the General Population. *Am J Epidemiol*. 2017;186(9):1026–34.
33. Patel AP, Wang M, Kartoun U, Ng K, Khera A V. Quantifying and Understanding the Higher Risk of Atherosclerotic Cardiovascular Disease among South Asian Individuals: Results from the UK Biobank Prospective Cohort Study. *Circulation*. 2021;144(6):410–22.
34. Sucato V, Coppola G, Manno G, Vadalà G, Novo G, Corrado E, et al. Coronary Artery Disease in South Asian Patients: Cardiovascular Risk Factors, Pathogenesis and Treatments. *Curr Probl Cardiol*. 2022;1–17.
35. Cook NR. Use and misuse of the receiver operating characteristic curve in risk prediction. *Circulation* [Internet]. 2007 Feb 20;115(7):928–35. Available from: <http://www.ncbi.nlm.nih.gov/pubmed/17309939>
36. Bycroft C, Freeman C, Petkova D, Band G, Elliott LT, Sharp K, et al. The UK Biobank resource with deep phenotyping and genomic data. *Nature* [Internet]. 2018 Oct 10;562(7726):203–9. Available from: <http://www.ncbi.nlm.nih.gov/pubmed/30305743>
37. Ritchie SC, Surendran P, Karthikeyan S, Lambert SA, Bolton T, Pennells L, et al. Quality control and removal of technical variation of NMR metabolic biomarker data in ~120,000 UK Biobank participants. *Sci Data* [Internet]. 2023 Jan 31;10(1):64. Available from: <https://www.nature.com/articles/s41597-023-01949-y>
38. Zhou W, Nielsen JB, Fritsche LG, Dey R, Gabrielsen ME, Wolford BN, et al. Efficiently controlling for case-control imbalance and sample relatedness in large-scale genetic association studies. *Nat Genet*. 2018 Sep 1;50(9):1335–41.

Manikpurage et al.

39. Yang J, Manolio TA, Pasquale LR, Boerwinkle E, Caporaso N, Cunningham JM, et al. Genome partitioning of genetic variation for complex traits using common SNPs. *Nat Genet.* 2011;43(6):519–25.
40. Yang J, Lee SH, Goddard ME, Visscher PM. GCTA: A tool for genome-wide complex trait analysis. *Am J Hum Genet* [Internet]. 2011;88(1):76–82. Available from: <http://dx.doi.org/10.1016/j.ajhg.2010.11.011>
41. Watanabe K, Taskesen E, Van Bochoven A, Posthuma D. Functional mapping and annotation of genetic associations with FUMA. *Nat Commun.* 2017 Dec 1;8(1).
42. de Leeuw CA, Mooij JM, Heskes T, Posthuma D. MAGMA: Generalized Gene-Set Analysis of GWAS Data. *PLoS Comput Biol.* 2015;11(4):1–19.
43. Privé F, Arbel J, Vilhjálmsson BJ. LDpred2: Better, faster, stronger. *Bioinformatics.* 2020 Dec 1;36(22–23):5424–31.
44. Manikpurage HD, Paulin A, Girard A, Eslami A, Mathieu P, Thériault S, et al. Contribution of Lipoprotein(a) to Polygenic Risk Prediction of Coronary Artery Disease: A Prospective UK Biobank Analysis. *Circ Genom Precis Med.* 2023 Oct 1;16(5):470–7.

Manikpurage et al.

**Tables**

| Sex   | Model                                                                                                  | Cases (n) | Total (n) | C-statistic (Bootstrap 95%CI) | Increment in model's C-statistic compared to the model without PRS (Bootstrap 95%CI) | Increment in model's C-statistic compared to the model equivalent model including PRS <sub>CAD</sub> only (Bootstrap 95%CI) |
|-------|--------------------------------------------------------------------------------------------------------|-----------|-----------|-------------------------------|--------------------------------------------------------------------------------------|-----------------------------------------------------------------------------------------------------------------------------|
| All   | No PRS                                                                                                 | 9,017     | 301,576   | 0.716 (0.711 to 0.721)        | NA (NA)                                                                              | NA (NA)                                                                                                                     |
|       | PRS <sub>CAD</sub>                                                                                     | 9,017     | 301,576   | 0.747 (0.742 to 0.751)        | 0.031 (0.028 to 0.034)                                                               | NA (NA)                                                                                                                     |
|       | PRS <sub>CAD</sub> + PRS <sub>VLDL-C</sub> + PRS <sub>Total C</sub> + PRS <sub>TG</sub>                | 9,017     | 301,576   | 0.749 (0.744 to 0.753)        | 0.033 (0.030 to 0.036)                                                               | 0.002 (0.001 to 0.003)                                                                                                      |
|       | No PRS + Risk Factors                                                                                  | 7,990     | 269,090   | 0.755 (0.751 to 0.760)        | NA (NA)                                                                              | NA (NA)                                                                                                                     |
|       | PRS <sub>CAD</sub> + Risk Factors                                                                      | 7,990     | 269,090   | 0.778 (0.773 to 0.782)        | 0.022 (0.020 to 0.025)                                                               | NA (NA)                                                                                                                     |
|       | PRS <sub>CAD</sub> + PRS <sub>VLDL-C</sub> + PRS <sub>Total C</sub> + PRS <sub>TG</sub> + Risk Factors | 7,990     | 269,090   | 0.778 (0.773 to 0.783)        | 0.022 (0.020 to 0.025)                                                               | 0 (0 to 0.001)                                                                                                              |
|       | No PRS + PCE                                                                                           | 7,814     | 266,530   | 0.749 (0.743 to 0.754)        | NA (NA)                                                                              | NA (NA)                                                                                                                     |
|       | PRS <sub>CAD</sub> + PCE                                                                               | 7,814     | 266,530   | 0.758 (0.753 to 0.763)        | 0.009 (0.006 to 0.012)                                                               | NA (NA)                                                                                                                     |
|       | PRS <sub>CAD</sub> + PRS <sub>VLDL-C</sub> + PRS <sub>Total C</sub> + PRS <sub>TG</sub> + PCE          | 7,814     | 266,530   | 0.758 (0.754 to 0.763)        | 0.009 (0.007 to 0.012)                                                               | 0 (0 to 0.001)                                                                                                              |
| Men   | No PRS                                                                                                 | 6,491     | 134,713   | 0.631 (0.625 to 0.638)        | NA (NA)                                                                              | NA (NA)                                                                                                                     |
|       | PRS <sub>CAD</sub>                                                                                     | 6,491     | 134,713   | 0.685 (0.679 to 0.691)        | 0.054 (0.049 to 0.059)                                                               | NA (NA)                                                                                                                     |
|       | PRS <sub>CAD</sub> + PRS <sub>VLDL-C</sub> + PRS <sub>Total C</sub> + PRS <sub>TG</sub>                | 6,491     | 134,713   | 0.688 (0.683 to 0.695)        | 0.058 (0.052 to 0.063)                                                               | 0.003 (0.002 to 0.005)                                                                                                      |
|       | No PRS + Risk Factors                                                                                  | 5,775     | 120,414   | 0.688 (0.682 to 0.695)        | NA (NA)                                                                              | NA (NA)                                                                                                                     |
|       | PRS <sub>CAD</sub> + Risk Factors                                                                      | 5,775     | 120,414   | 0.723 (0.718 to 0.730)        | 0.035 (0.031 to 0.039)                                                               | NA (NA)                                                                                                                     |
|       | PRS <sub>CAD</sub> + PRS <sub>VLDL-C</sub> + PRS <sub>Total C</sub> + PRS <sub>TG</sub> + Risk Factors | 5,775     | 120,414   | 0.723 (0.718 to 0.730)        | 0.035 (0.031 to 0.040)                                                               | 0 (0 to 0.001)                                                                                                              |
|       | No PRS + PCE                                                                                           | 5,649     | 118,876   | 0.683 (0.676 to 0.689)        | NA (NA)                                                                              | NA (NA)                                                                                                                     |
|       | PRS <sub>CAD</sub> + PCE                                                                               | 5,649     | 118,876   | 0.712 (0.707 to 0.718)        | 0.03 (0.026 to 0.034)                                                                | NA (NA)                                                                                                                     |
|       | PRS <sub>CAD</sub> + PRS <sub>VLDL-C</sub> + PRS <sub>Total C</sub> + PRS <sub>TG</sub> + PCE          | 5,649     | 118,876   | 0.714 (0.707 to 0.720)        | 0.031 (0.027 to 0.036)                                                               | 0.001 (0.001 to 0.002)                                                                                                      |
| Women | No PRS                                                                                                 | 2,526     | 166,863   | 0.675 (0.666 to 0.686)        | NA (NA)                                                                              | NA (NA)                                                                                                                     |
|       | PRS <sub>CAD</sub>                                                                                     | 2,526     | 166,863   | 0.709 (0.701 to 0.720)        | 0.035 (0.028 to 0.041)                                                               | NA (NA)                                                                                                                     |
|       | PRS <sub>CAD</sub> + PRS <sub>VLDL-C</sub> + PRS <sub>Total C</sub> + PRS <sub>TG</sub>                | 2,526     | 166,863   | 0.711 (0.702 to 0.722)        | 0.036 (0.030 to 0.043)                                                               | 0.002 (0.001 to 0.004)                                                                                                      |
|       | No PRS + Risk Factors                                                                                  | 2,215     | 148,676   | 0.739 (0.730 to 0.748)        | NA (NA)                                                                              | NA (NA)                                                                                                                     |
|       | PRS <sub>CAD</sub> + Risk Factors                                                                      | 2,215     | 148,676   | 0.758 (0.749 to 0.768)        | 0.019 (0.015 to 0.023)                                                               | NA (NA)                                                                                                                     |
|       | PRS <sub>CAD</sub> + PRS <sub>VLDL-C</sub> + PRS <sub>Total C</sub> + PRS <sub>TG</sub> + Risk Factors | 2,215     | 148,676   | 0.758 (0.750 to 0.769)        | 0.020 (0.015 to 0.024)                                                               | 0.001 (0 to 0.002)                                                                                                          |
|       | No PRS + PCE                                                                                           | 2,165     | 147,654   | 0.726 (0.715 to 0.736)        | NA (NA)                                                                              | NA (NA)                                                                                                                     |
|       | PRS <sub>CAD</sub> + PCE                                                                               | 2,165     | 147,654   | 0.726 (0.717 to 0.739)        | -0.001 (-0.007 to 0.010)                                                             | NA (NA)                                                                                                                     |
|       | PRS <sub>CAD</sub> + PRS <sub>VLDL-C</sub> + PRS <sub>Total C</sub> + PRS <sub>TG</sub> + PCE          | 2,165     | 147,654   | 0.726 (0.717 to 0.740)        | 0 (-0.006 to 0.011)                                                                  | 0.001 (0 to 0.002)                                                                                                          |

Manikpurage et al.

**Table 1: Comparison of discriminative capacities using Harrell's C statistic in Cox**

**regression models for the incidence of CAD.** Cox regression models adjusted for age,

sex and the first ten genetic principal components (PCs) in all individuals without a

previous history of CAD (n=301,576), and only age and PCs for sex-stratified analyses.

Difference between the C-statistic (Delta C-statistic) of the studied model and the C-

statistic of the model without PRS or with PRS<sub>CAD</sub> only are reported. Risk factors include

body mass index, systolic blood pressure, hypertension, diabetes, smoking status,

triglycerides levels and low-density lipoprotein cholesterol levels (corrected if lipid

lowering treatments were taken). 95% confidence intervals were obtained by

bootstrapping. C: Cholesterol; CAD: coronary artery disease; NA: not applicable; VLDL:

very low-density lipoprotein; TG: triglycerides.



Manikpurage et al.

## Figures

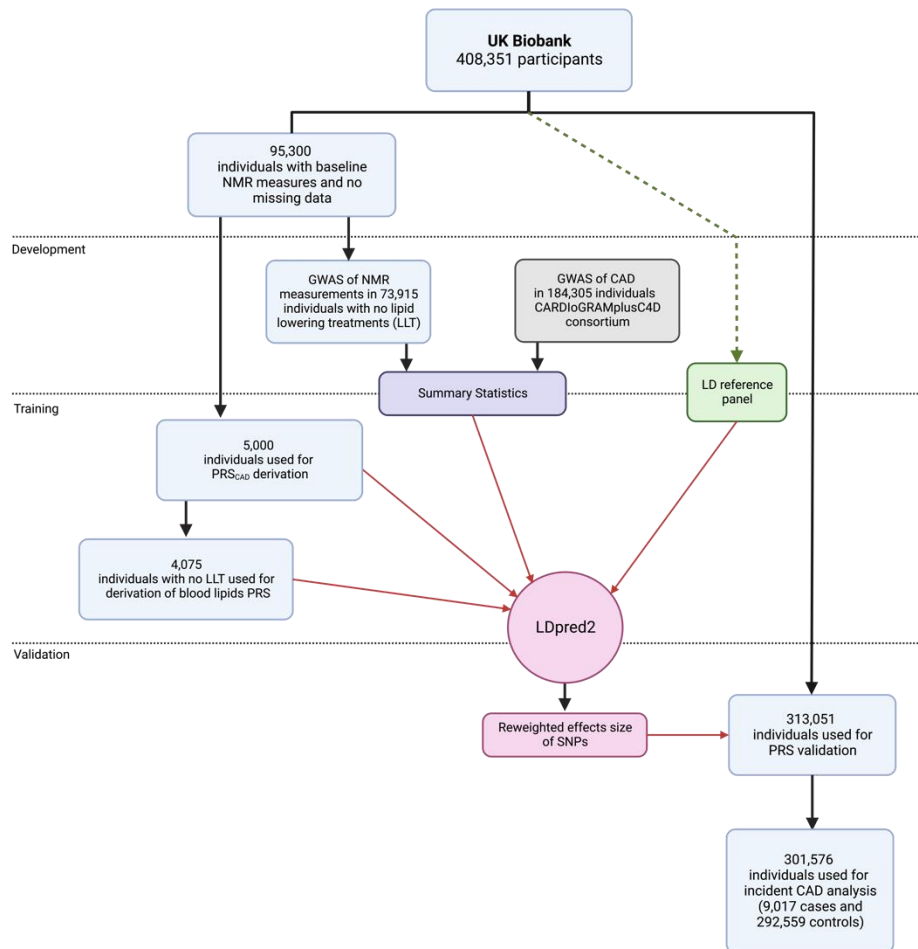

**Figure 1: Flowchart of the study design.** Overview of participants' selection for genome-wide association analyses (i.e. development) and PRS calculation (i.e. training and validation). CAD: coronary artery disease; LD: linkage disequilibrium; LLT: lipid-lowering treatments; NMR: nuclear magnetic resonance; PRS: polygenic risk score; SNPs: single nucleotide polymorphisms

Manikpurage et al.

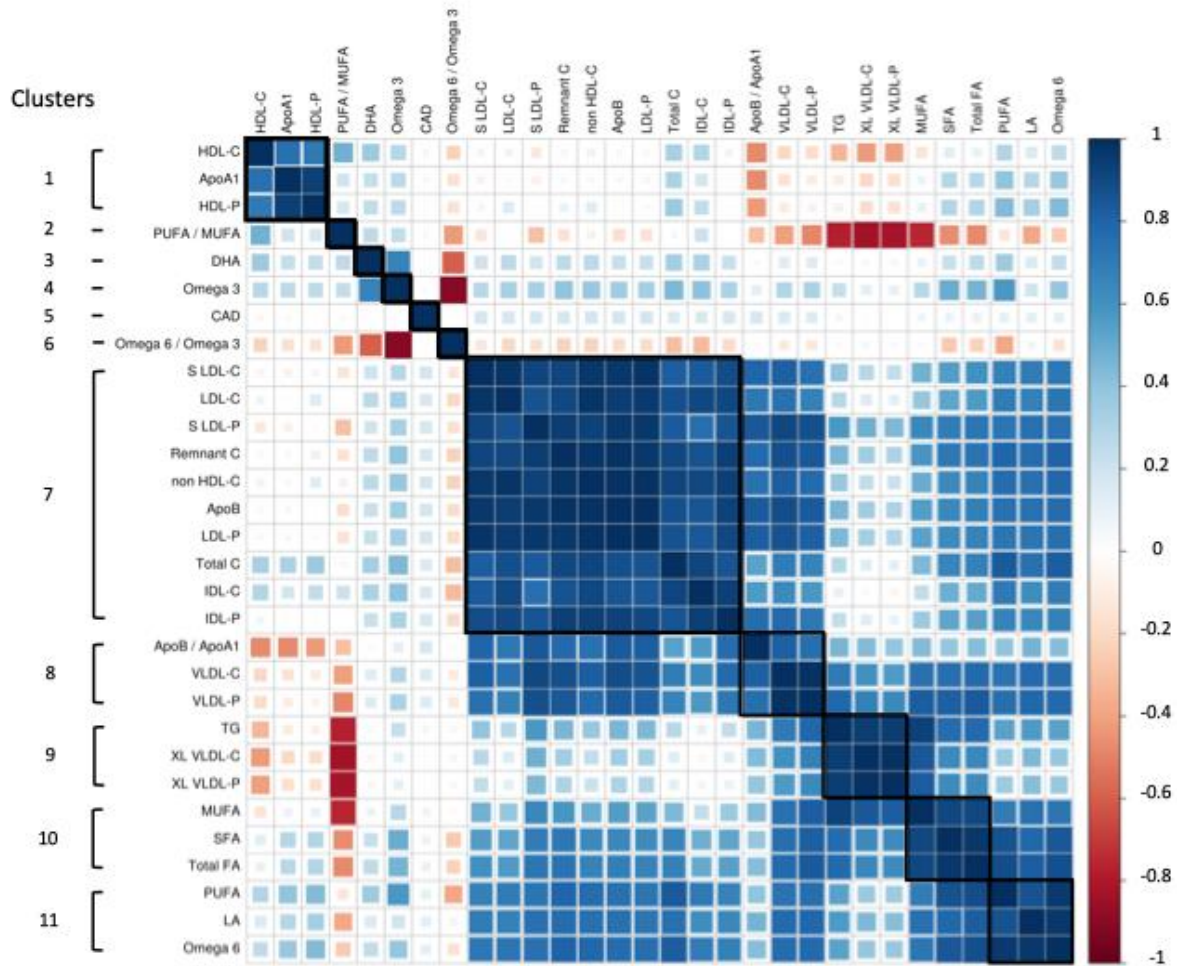

**Figure 2: Correlation between PRS for circulating blood lipids measured by NMR**

**and PRS<sub>CAD</sub>.** Data are presented as gradient of Pearson's coefficient of correlation ( $r$ ) in the validation dataset ( $n = 313,051$ ) and clusters of correlated PRS. ApoA: apolipoprotein A1; ApoB: apolipoprotein B; C: cholesterol; CAD: coronary artery disease; DHA: docosahexaenoic acid; FA: fatty acids; HDL: high-density lipoprotein; IDL: intermediate-density lipoprotein; LA: linoleic acid; LDL: low-density lipoprotein; MUFA: monounsaturated fatty acids; P: Particles; PUFA: polyunsaturated fatty acids; SFA: saturated fatty acids; S LDL: small low-density lipoprotein; VLDL: very-low-density lipoprotein; Total C: total cholesterol; TG: triglycerides; XL VLDL: extra-large very low-density lipoprotein or chylomicron

Manikpurage et al.

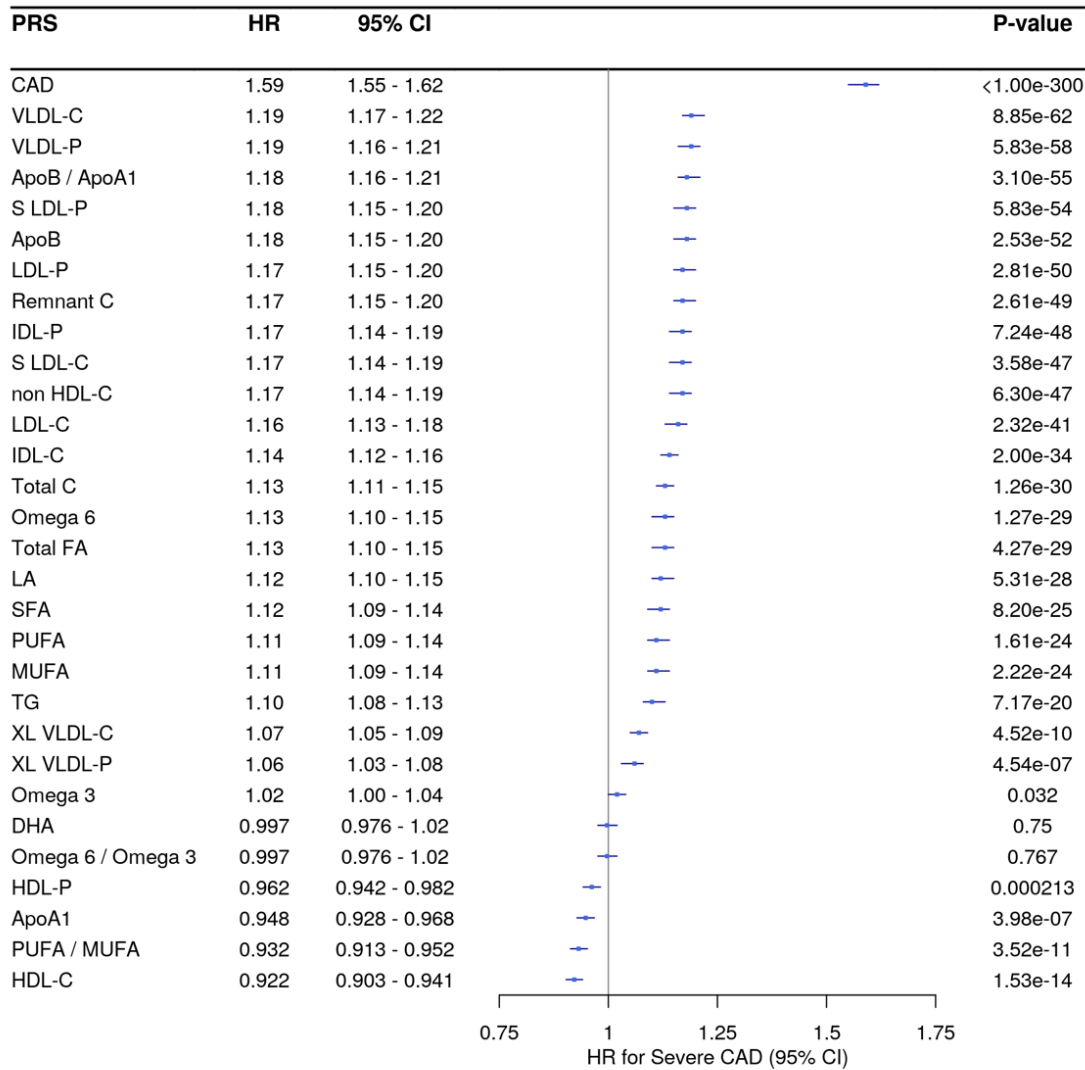

**Figure 3: Association of PRS for blood lipids measured by NMR and PRS<sub>CAD</sub> with**

**the incidence of CAD.** Cox regression results were obtained from models adjusted for age, sex and the first ten genetic principal components in all individuals without CAD at recruitment (n=301,576). Data are presented as estimated hazard ratios (HR) for incident CAD per SD increase of PRS. 95% confidence intervals (95% CI) were calculated using bootstrap (1000 iterations). ApoA1: apolipoprotein A1; ApoB: apolipoprotein B; C: cholesterol; CAD: coronary artery disease; DHA: docosahexaenoic acid; FA: fatty acids; HDL: high-density lipoprotein; IDL: intermediate-density lipoprotein; LA: linoleic acid;

Manikpurage et al.

LDL: low-density lipoprotein; MUFA: monounsaturated fatty acids; P: Particles; PUFA: polyunsaturated fatty acids; SFA: saturated fatty acids; S LDL: small low-density lipoprotein; VLDL: very low-density lipoprotein; Total C: total cholesterol; TG: triglycerides; XL VLDL: extra-large very low-density lipoprotein or chylomicron

Manikpurage et al.

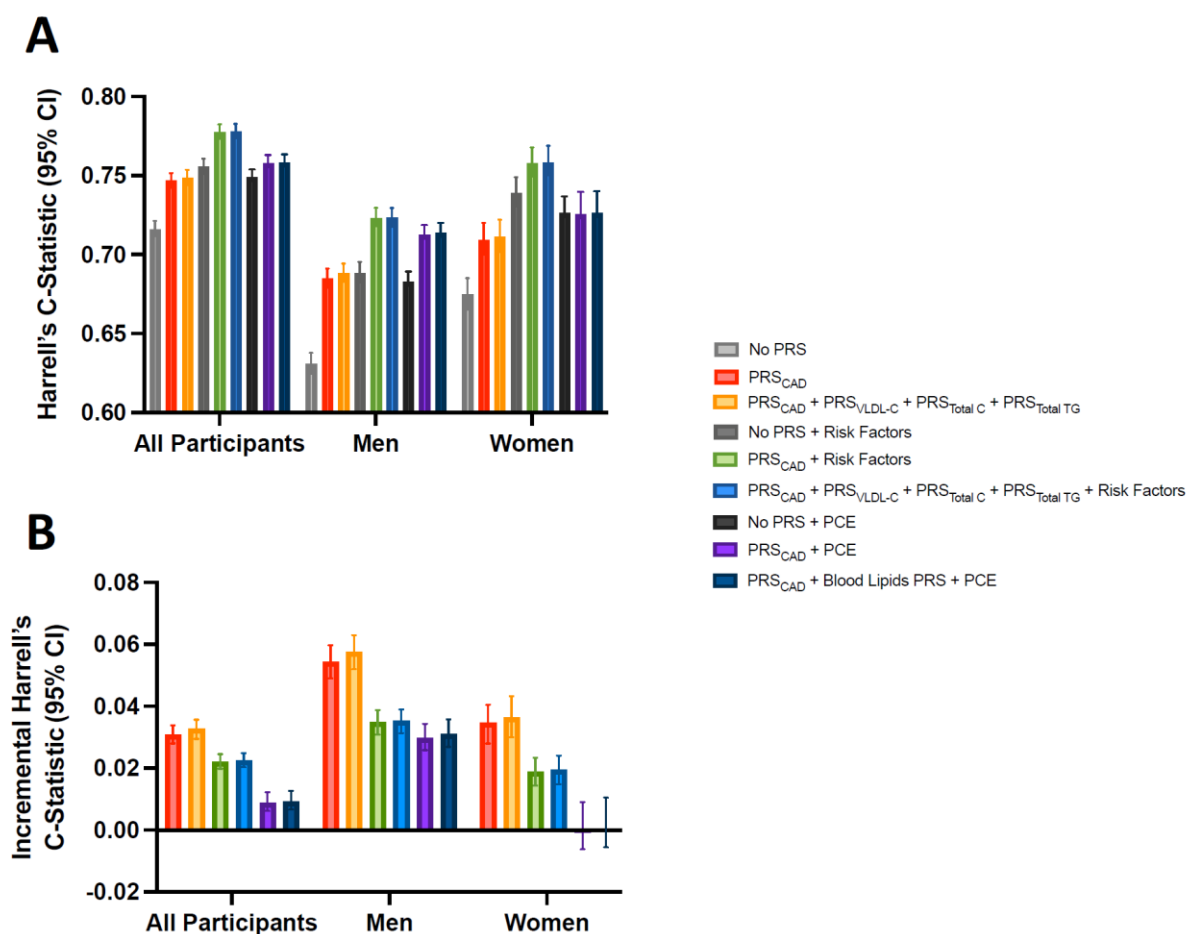

**Figure 4: Increment in discrimination capacities using Harrell's C-statistic in Cox regression models for the incidence of CAD.** Data are presented as C-statistic (A) and

increment in C-Statistic compared to the model without PRS (i.e. difference of C-statistics) (B), in all individuals, and separately in men and women. 95% confidence intervals (95% CI) were calculated using bootstrap (1000 iterations). All models include age, sex (not for sex-stratified analysis) and the first ten genetic principal components. Risk factors include body mass index, systolic blood pressure, hypertension, diabetes, smoking status, triglycerides levels and LDL-C levels. C: cholesterol; CAD: coronary artery disease; P: Particles; PCE: Pooled Cohort Equation; PRS: polygenic risk score; VLDL: very low-density lipoprotein; Total C: total cholesterol; TG: triglycerides.
